# Supplementary material
Source: PubMed Central journal article supplement (PMC1637574)

**A****-dL/dt max**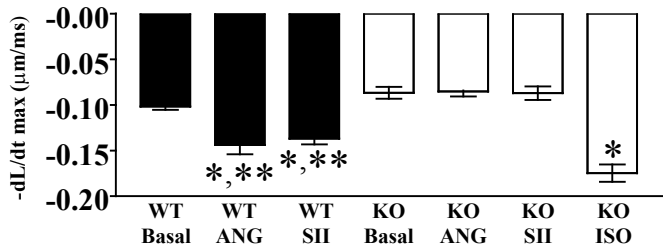**B****+dL/dt max**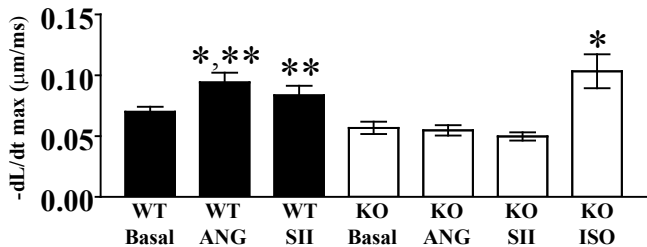

Supplement: pnas_0607583103_1.pdf [file pnas_0607583103_1.pdf]

**A****-dL/dt max**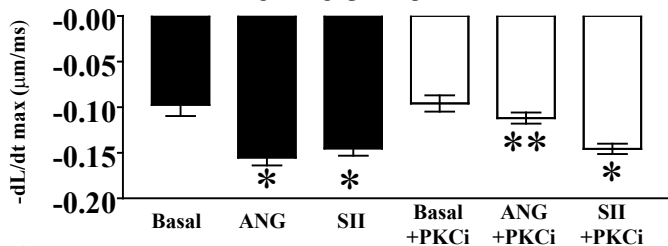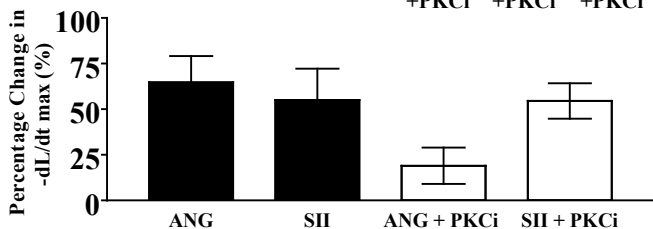**B****+dL/dt max**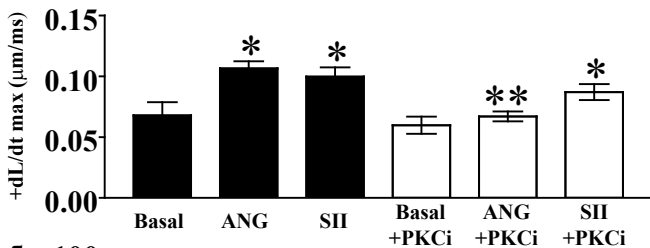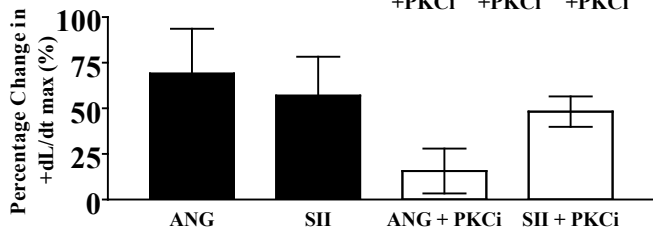

Supplement: pnas_0607583103_2.pdf [file pnas_0607583103_2.pdf]

**A****WT**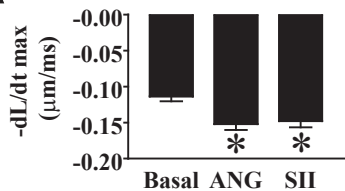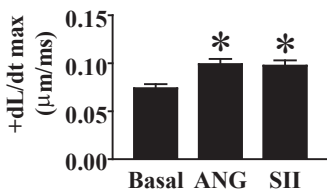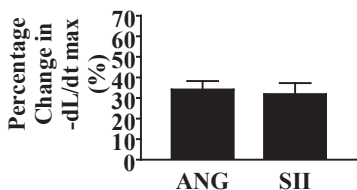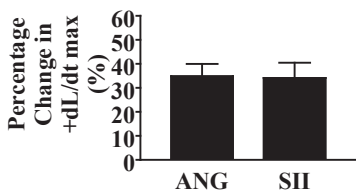**B****β-arrestin2 KO**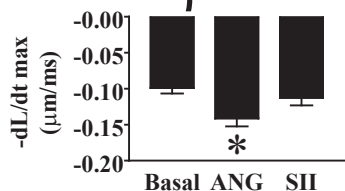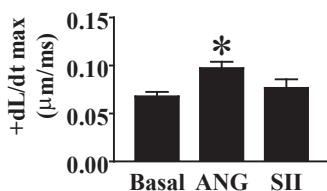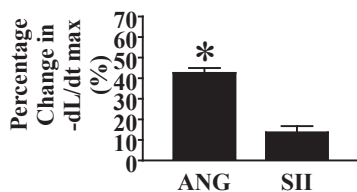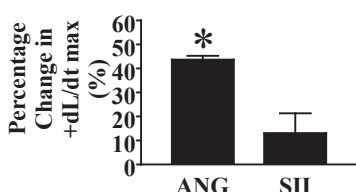**C****β-arrestin1 KO**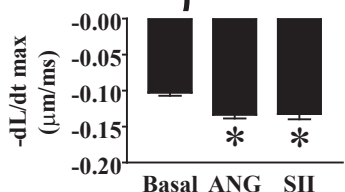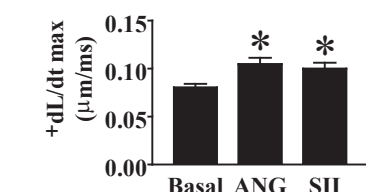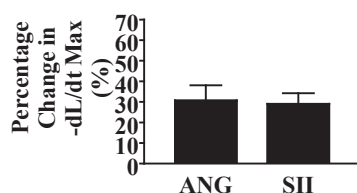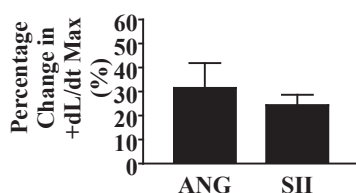**-dL/dt max****+dL/dt max**

Supplement: pnas_0607583103_3.pdf [file pnas_0607583103_3.pdf]

**A****GRK5 KO**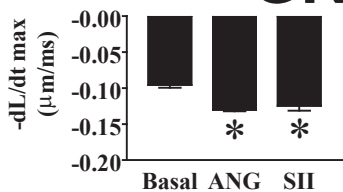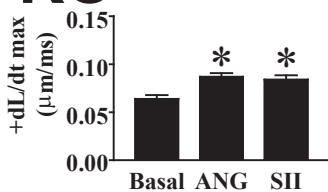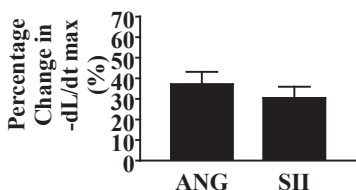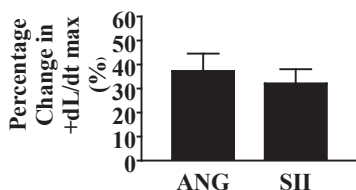**B****GRK6 KO**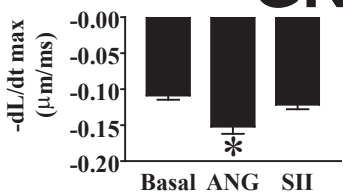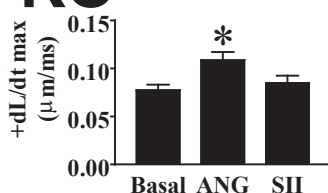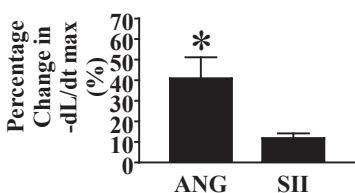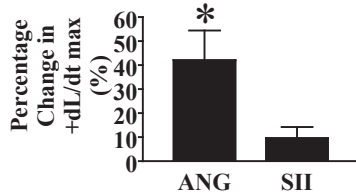**C****GRK2 +/-**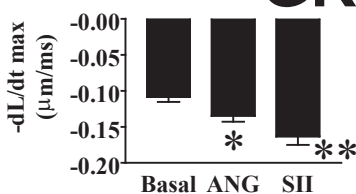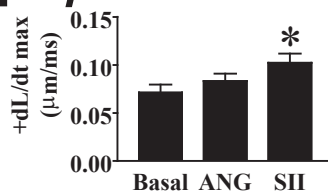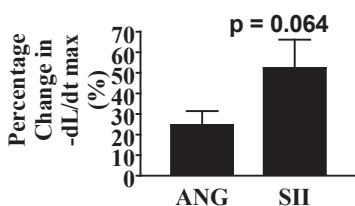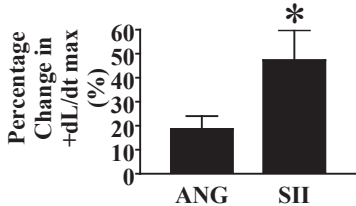**-dL/dt max****+dL/dt max**

Supplement: pnas_0607583103_4.pdf [file pnas_0607583103_4.pdf]
